Anesthesiology  
1997; 87:1199-209  
© 1997 American Society of Anesthesiologists, Inc.  
Lippincott-Raven Publishers

## Differential Effects of Thiopental on Neuronal Nicotinic Acetylcholine Receptors and $P_{2X}$ Purinergic Receptors in PC12 Cells

Tomio Andoh, M.D., Ph.D.,\* Ryouzuke Furuya, M.D.,† Keikou Oka, M.D.,† Satoshi Hattori, M.D., Ph.D.,† Itaru Watanabe, M.D.,† Yoshitaka Kamiya, M.D.,† Fukuichiro Okumura, M.D., Ph.D.‡

**Background:** PC12 cells, derived from rat pheochromocytoma, express neuronal nicotinic acetylcholine receptors (nAChRs) and  $P_{2X}$  purinergic receptors, both of which resemble the receptors in postganglionic sympathetic neurons. The former is the established and the latter is the putative receptor to mediate fast synaptic transmission. The authors investigated effects of thiopental on these two ligand-gated ion channels.

**Methods:** Whole cell currents were recorded in PC12 cells without treatment of nerve growth factor, using conventional whole cell patch clamp technique. Nicotine or adenosine triphosphate (ATP) 30  $\mu$ M was applied for 4–5 s in the absence or presence of thiopental 3–300  $\mu$ M.

**Results:** Nicotine induced the rapidly decaying inward current at –60 mV, which exhibited the characteristics of the neuronal nAChR-mediated current. Thiopental inhibited the nicotine-induced inward current and accelerated the current decay in a dose-dependent manner, resulting in the greater effects on the steady current than the peak current. IC<sub>50</sub>s for the peak and steady current were 56.7 and 7.4  $\mu$ M, when the anesthetic was coapplied with nicotine. Thiopental's inhibition was not associated with a change in the reversal potential and was voltage-independent at membrane potential of –30 to –70 mV. Most of thiopental's effects seemed to require channel opening. In contrast to the nicotine-induced current, thiopental had little effect on the current elicited by ATP.

**Conclusions:** Thiopental, whose reported EC<sub>50</sub> for general anesthesia is 25  $\mu$ M, inhibited the neuronal nAChR-mediated current but not the  $P_{2X}$  receptor-mediated response in PC12 cells at clinically relevant concentrations. Inhibition may re-

sult in suppression of synaptic transmission in sympathetic ganglia. (Key words: Anesthetics, intravenous: thiopental. Ion channels. Measurement techniques: patch clamp; PC12 cells. Receptors: nicotinic; purinergic.)

NEURONAL nicotinic acetylcholine receptors (neuronal nAChRs) widely expressed in central and peripheral neurons are distinct from muscle nAChRs in terms of subunit composition, electrophysiology, and pharmacology.<sup>1,2</sup> For example, although muscle and neuronal receptors are composed of five subunits and muscle-type receptors consist of four different subunit types, neuronal counterparts require only one or two subunit types to form functional receptors.<sup>2</sup> Neuronal nAChRs mediate fast synaptic transmission in autonomic ganglia. Additionally, increasing evidence indicates that pre- and postsynaptic neuronal nAChRs play functional roles in central nervous system.<sup>2,3</sup> Although many studies showed the inhibitory effects of anesthetics on muscle nAChRs,<sup>4,5</sup> there have been few electrophysiologic studies investigating the anesthetic effects on neuronal nAChRs in mammalian cells.

Inhibitory effects by barbiturates on the nicotine-induced catecholamine release have been reported in adrenal medullary cells, suggesting inhibition of neuronal nAChRs.<sup>6,7</sup> The electrophysiologic studies using spectral analysis of macroscopic current and single channel recording revealed inhibitory effects on neuronal nAChRs by pentobarbitone and methohexitone.<sup>8,9</sup> However, direct stimulatory actions on GABA<sub>A</sub> receptor channels by the anesthetics could affect the effects on nicotinic channels because chromaffin cells possess functional GABA<sub>A</sub> receptor channels.<sup>10,11</sup> In contrast, PC12 cells, rat pheochromocytoma cell line, express ganglion type neuronal nAChRs<sup>12–14</sup> but lack functional GABA<sub>A</sub> receptor channels without treatment of nerve growth factors (NGF).<sup>15,16</sup>

In many tissues, extracellular adenosine 5'-triphosphate (ATP) has been shown to act as a transmitter or a

\* Assistant Professor, Department of Anesthesiology.

† Lecturer, Department of Anesthesiology.

‡ Professor and Chairman, Department of Anesthesiology.

Received from the Department of Anesthesiology, Yokohama City University School of Medicine, Yokohama, Japan. Submitted for publication September 20, 1996. Accepted for publication July 28, 1997. Supported in part by grant-in-aid for scientific research (08671761 to T.A. and 08771216 to R.F.) from the Ministry of Education, Science and Culture, Japan.

Address correspondence to Dr. Andoh: Department of Anesthesiology, Yokohama City University School of Medicine, 3-9 Fukuura, Kanazawa-ku, Yokohama 236, Japan. Address electronic mail to: tandoh@med.yokohama-cu.ac.jp



cotransmitter and to activate purine  $P_2$  receptors, which consist of two classes of receptors: G protein-linked receptors (mainly  $P_{2Y}$ ) or ligand-gated ion channel ( $P_{2X}$ ).<sup>17</sup> In the sympathetic and central nervous systems, it has been known that ATP is released from nerve terminals and binds to postsynaptic  $P_{2X}$  receptors, resulting in fast excitatory synaptic current,<sup>18,19</sup> and that nAChRs and  $P_{2X}$  receptors are often colocalized in the same neuron.<sup>18-20</sup> PC12 cells also express  $P_{2X}$  receptors and have been extensively studied on characteristics of these receptors.<sup>21-23</sup> However, effects of barbiturates on  $P_{2X}$  receptors have not been clarified.

Nicotinic acetylcholine receptors and  $P_{2X}$  receptors in PC12 cells resemble those expressed in rat postganglionic sympathetic neurons.<sup>14,24-26</sup> Acetylcholine is an established neurotransmitter, and ATP is a putative neurotransmitter in sympathetic ganglia. We used undifferentiated PC12 cells to study effects of thiopental on these two ligand-gated ion channels. The main aims of this study are (1) to study the effects of thiopental on neuronal nAChRs without potential contamination from direct actions on GABA<sub>A</sub> receptors using whole cell voltage clamp recording and (2) to compare this effect with that on the  $P_{2X}$  purinergic receptor-mediated current.

## Materials and Methods

### Cell Culture

PC12 cell line was provided by Japanese Cancer Research Resources Bank-Cell Bank. Cells were grown in RPMI 1640 supplemented with 10% heat-inactivated fetal bovine serum and 5% horse serum plus 0.3 mg/ml glutamine, 50 U/ml penicillin, and 100  $\mu$ g/ml streptomycin. Cells were maintained in 25-cm<sup>2</sup> flasks in a 95% air, 5% CO<sub>2</sub> atmosphere at 37°C. For the experiment, cells were plated on collagen-coated cover slips and used after additional 2-4 day culture.

### Electrophysiology

Membrane currents were measured by conventional whole cell voltage clamp method.<sup>27</sup> Cells on the cover slips were placed in a recording bath with an approximate volume of 1.5 ml and continuously perfused at the rate of 1-2 ml/min with a standard external solution containing (in mM), NaCl, 140; KCl, 5.4; CaCl<sub>2</sub>, 1.8; MgCl<sub>2</sub>, 1.0; N-2-hydroxy ethylpiperazine-N'-2-ethanesulphonic acid (HEPES), 10; and glucose, 11.1 (pH was adjusted to 7.4 with NaOH). Heat-polished patch pipettes had tip resistance of 2-7 M $\Omega$  when filled with

an intracellular solution containing (in mM) CsCl, 150; HEPES, 10; ethylene glycol-bis-( $\beta$ -aminoethyl ether) tetraacetic acid, 5; Mg-ATP, 2 (pH, 7.3 with CsOH). Cells were voltage clamped at -60 mV with a patch clamp amplifier (CEZ 2300, Nihon Kodens, Tokyo, Japan) unless otherwise stated. Whole cell currents were filtered at 0.2 KHz with Bessel filter and digitized at 0.5 kHz in most of the cases, or they were filtered at 0.2 KHz with Gaussian filter and digitized at 1 KHz in a few cases. The currents were stored and analyzed on a computer using Pclamp software (Axon Instruments, Foster City, CA). For display of the current traces, the data were 10 times reduced by averaging 10 points to yield a single point. All experiments were performed at room temperature (22-25°C).

### Drug Application

Nicotine or ATP-Na<sub>2</sub> of 30  $\mu$ M in the external solution was applied to cells using a rapid application technique described as the "Y-tube" method.<sup>28</sup> The tip of the Y-tube was made by a glass micropipette (Microcaps, 2  $\mu$ l, Drummond) with about 100  $\mu$ m-opening and was positioned about 500  $\mu$ m from the recorded cell. This method enabled the complete exchange of the external solution surrounding the cell around 100 ms, as estimated by recording the liquid junction current produced at an open patch pipette. The agonists with or without anesthetics were applied for 4-5 s, and each application was separated by 5 min. Thiopental was coapplied with the agonists using the same method. For preincubation with the anesthetic or the antagonists, the external solutions containing the drugs were perfused at the rate of 5 ml/min for 5 min before rapid application. Cells were perfused with the plain external solution at the same rate for 5 min to wash out the drugs from the bath after the measurement.

Nicotine of 100 or 300  $\mu$ M was also tested to see if higher concentration of nicotine can overcome the inhibition by thiopental.

### Current-voltage Relationship

Instantaneous current-voltage curves were obtained for nicotine 30  $\mu$ M alone and for nicotine with thiopental 30  $\mu$ M after preincubation of thiopental. A ramp pulse of +30 to -70 mV (100 mV/200 ms) was applied to a cell every 200 ms,<sup>29</sup> and current traces near the peak current were subtracted from those in the absence of agonist. Five cells that exhibited slow desensitization were chosen for this experiment to avoid a large decline of the current during the ramp pulse.



### Drugs

Drugs used in the current study included (–)-nicotine, hexamethonium, suramin (Wako, Osaka, Japan), ATP- $\text{Na}_2$ , ATP-Mg (Sigma, St Louis, MO), and thiopental sodium (Tanabe, Osaka, Japan). Thiopental sodium was dissolved in distilled water to make 100 mM stock solution and diluted with the external solution to the designated concentration.

### Data Analysis

We measured the peak current and the steady current, which was defined as the average of the preceding 50 points at 4 s during agonist application. Because nicotine-elicited currents declined with each application of agonist, the response in the presence of thiopental was compared with the average of the elicited current before and after thiopental application. To verify this procedure, nicotine was applied successively three times with an interval of 5 min, and the second response was compared with the average of the first and third responses. The same procedure was applied for the ATP-induced current.

The decaying phases of the nicotine-induced current were fitted either to a single or a double exponential function of the following form by simplex method using Axograph software (Axon Instruments, Foster City, CA):

$$I = I_{\text{final}} + \sum I_i \times \exp(-t/\tau_i)$$

where  $I$  is the total peak current,  $I_{\text{final}}$  is the residual current during the steady state condition,  $I_i$  is the peak current amplitude of the each component, and  $\tau_i$  is the time constant of the corresponding component. Goodness of fit was compared by chi-square test between a single and a double exponential models. The time constants of the decay were measured for the baseline responses just before the thiopental administration (Baseline) and the responses in the presence of thiopental (Thiop). These measurements were done for the experiments with thiopental preincubation and for the ones wherein nicotine alone was applied successively. The ratios of the time constants for two successive responses (Thiop/Baseline) were calculated to see the time-dependent changes and the effects of thiopental. Desensitization was also evaluated by calculating the percent decay of the current (% current decay) defined by the equation<sup>30</sup>:

$$\% \text{ current decay} = (I_{\text{peak}} - I_{\text{steady}})/I_{\text{peak}} \times 100$$

where  $I_{\text{peak}}$  denotes the peak current and  $I_{\text{steady}}$  denotes the steady current.

### Statistical Analysis

Data are expressed as mean  $\pm$  SEM; unpaired  $t$  test and analysis of variance (ANOVA) followed by Dunnett's test were used to estimate the significance when appropriate.  $P$  less than 0.05 was considered to be significant.

## Results

### The Nicotine-induced Current

Nicotine elicited inward currents at  $-60$  mV. The nicotine-induced current decayed rapidly during agonist application, consistent with other studies, as a result of desensitization.<sup>13,29,31</sup> The peak current varied greatly with recorded cells, from 50 to 800 pA. When nicotine was applied successively, the peak and steady current declined with each application, so that the third response accounted for  $72 \pm 9\%$  for the peak current and  $66 \pm 13\%$  for the steady current of the first response ( $n = 7$ ). The magnitude of decline seemed to depend on the interval between the applications of the agonist, *i.e.*, the short interval enhanced the decline. Therefore, some reversible processes such as desensitization and reversal from desensitization should contribute to this phenomenon at least in part. Because the second response was close to the average of the first and the third response,  $100 \pm 3\%$  for the peak current and  $102 \pm 6\%$  for the steady current ( $n = 7$ ), the effects of thiopental were evaluated by comparison with the average of the control responses before and after administration of thiopental.

The nicotine-induced current was strongly depressed by  $100 \mu\text{M}$  hexamethonium, a competitive antagonist for neuronal nACh receptors. The peak and steady current was  $17 \pm 3\%$  and  $10 \pm 2\%$  of the average of the control responses when  $100 \mu\text{M}$  hexamethonium was preperfused and coapplied ( $n = 4$ ).

### Effects of Thiopental on the Nicotine-induced Current

Thiopental alone induced no current responses at 100 or  $300 \mu\text{M}$  in tested cells ( $n = 6$  for both).  $300 \mu\text{M}$  is about 10 times higher than reported  $\text{EC}_{50}$  for general anesthesia and the maximum concentration used in the present study.<sup>32</sup> Thiopental, 3– $300 \mu\text{M}$ , when coapplied with nicotine, inhibited the peak and steady current in a dose-dependent manner (fig. 1). The inhibition was much stronger for the steady current than for the peak current. Thiopental,  $100 \mu\text{M}$ , almost completely abol-



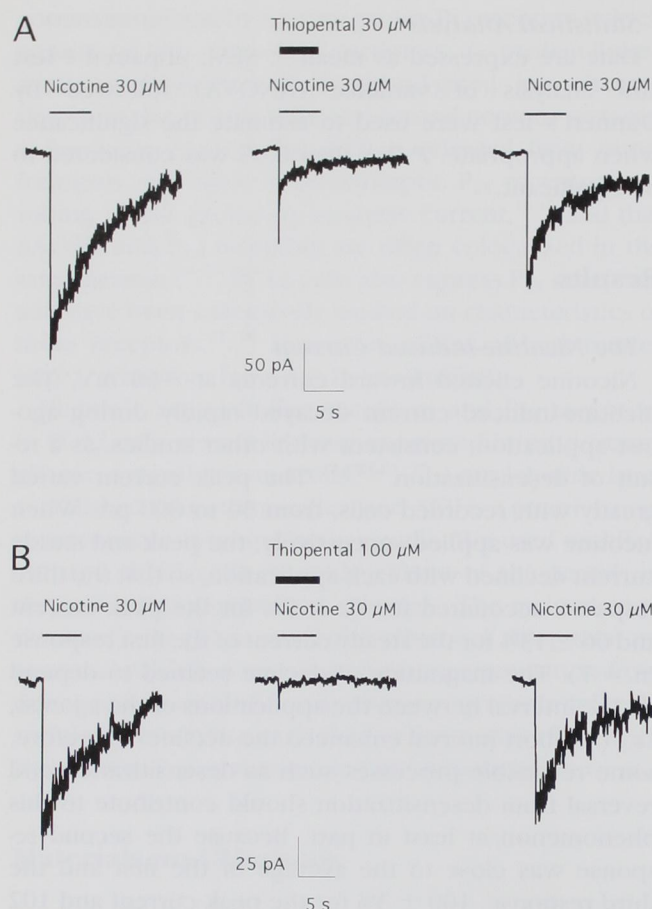

Fig. 1. Inhibition by thiopental of the current evoked by 30  $\mu$ M nicotine in PC12 cells. Cells were held at  $-60$  mV. Nicotine was applied during the period indicated by *light horizontal bar*. Thiopental 30 (A) and 100  $\mu$ M (B) was coapplied with nicotine as indicated by *thick bar*. Thiopental suppressed the nicotine-induced current reversibly, with greater effects on the steady current than on the peak current. Thiopental, 100  $\mu$ M, almost completely abolished the steady current.

ished the steady current. Regarding reversibility of inhibition, the ratio of the postcontrol responses after thiopental to the precontrol values was not different from that of three successive nicotine applications, indicating that nicotine responses recovered fully from thiopental's inhibition after a 5-min interval (fig. 2). IC<sub>50</sub>s for the peak and steady current were  $56.7 \pm 10.1$  and  $7.4 \pm 1.4$   $\mu$ M, respectively (fig. 3A).

When cells were preincubated with thiopental and then nicotine and thiopental were coapplied, inhibition of the peak current was still much smaller than that of the steady current. The relative peak currents in the presence of thiopental with or without preincubation were not different from each other at any dose of thio-

pental except for 3  $\mu$ M, wherein the relative peak current without preincubation was significantly smaller than that with preincubation. The magnitudes of blockade of the steady currents were also similar regardless of the presence or absence of preincubation. IC<sub>50</sub>s for the peak and steady current were  $49.2 \pm 11.1$  and  $6.1 \pm 0.6$   $\mu$ M, when thiopental preincubation was performed (fig. 3B). There were no statistically significant differences in IC<sub>50</sub> or Hill coefficient for the peak and

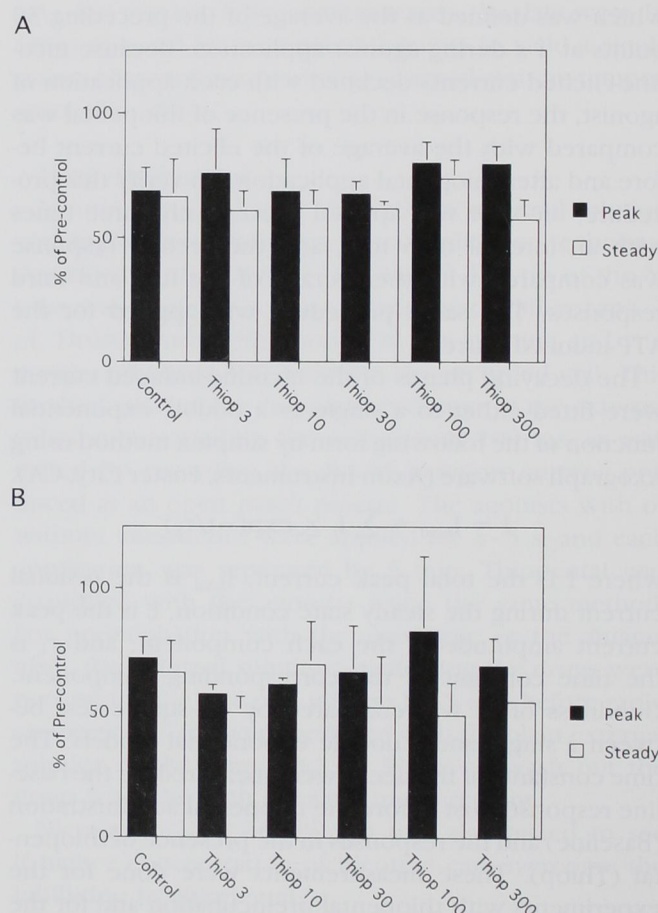

Fig. 2. Comparison of recovery from thiopental's inhibition among different conditions. In the control group, nicotine was applied successively three times with 5-min interval; in the thiopental groups, nicotine with thiopental of designated dose was applied between two nicotine applications. The third nicotine-induced responses (% of precontrol) to see the natural decline of the nicotine responses in the control group and the extent of recovery from inhibition in the thiopental groups. In the absence (A) or the presence of (B) preincubation of thiopental, % of precontrol were not different from that of the control condition at any dose of thiopental, indicating that recovery from thiopental's inhibition was complete. Each column represents mean with SEM from four to seven experiments.



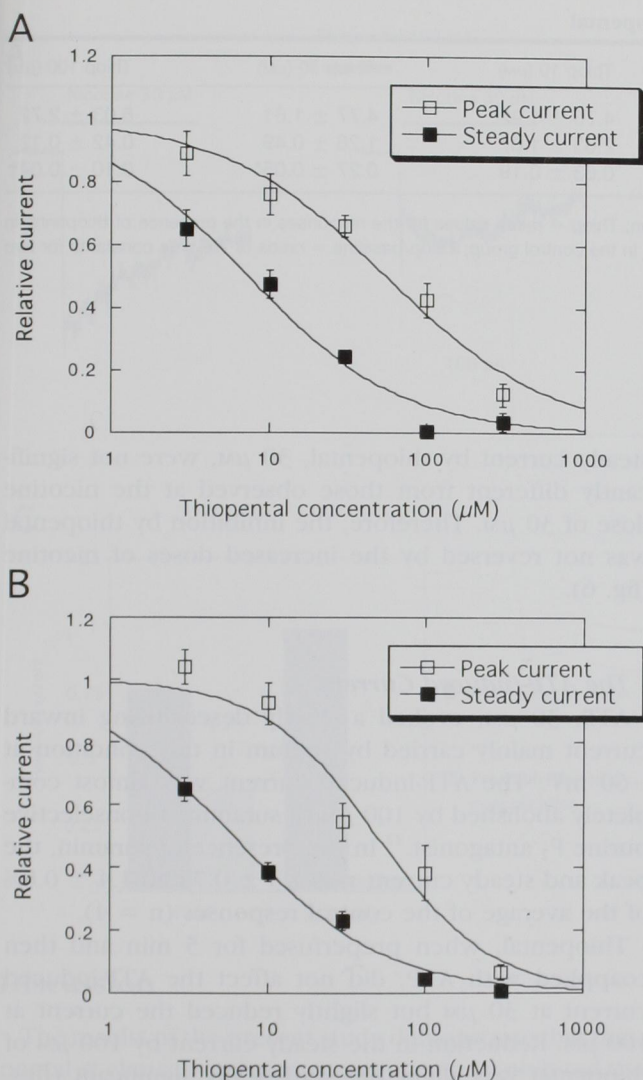

**Fig. 3.** The concentration-inhibition curve for thiopental on the nicotine-induced current. The currents in the presence of thiopental were normalized to the average of the control currents before and after thiopental and plotted against the concentration of thiopental. A least-squares fit was performed using the equation:  $I = 1 - C^n / (C^n + K_d^n)$ , where  $I$ : relative current,  $C$ : concentration of thiopental,  $n$ : the Hill coefficient,  $K_d$ : the dissociation constant. Without preincubation (A), the fitting procedure gave a  $K_d$  of  $56.7 \pm 10.1 \mu\text{M}$ , a Hill coefficient of  $0.83 \pm 0.13$  for the peak current, and gave a  $K_d$  of  $7.4 \pm 1.4 \mu\text{M}$  and a Hill coefficient of  $0.9 \pm 0.16$  for the steady current. With preincubation (B), it gave  $K_d$  of  $49.2 \pm 11.1$  and  $6.1 \pm 0.6 \mu\text{M}$  and Hill coefficients of  $1.19 \pm 0.29$  and  $0.9 \pm 0.08$  for the peak and steady current.  $r^2$  was 0.96 in (A) and 0.99 in (B), respectively. Each point represents mean of four to six experiments, and error bar indicates SEM.

steady current measured with thiopental preincubation when compared with the values obtained without preincubation.

#### Desensitization of the Nicotine-induced Current

The decay phases of the nicotine-induced current with and without thiopental were well fitted to single exponential functions. Because fitting to double exponential curve did not improve the adequacy of the fit, single exponential models were used. Although the absolute values of the time constants of the decay varied greatly cell to cell for the control responses (from 0.73 to 10.79 s), they did not change significantly with the repeated nicotine applications as judged by the ratio of the time constants of two successive nicotine responses. There was a tendency that the time constants decreased with increasing concentration of thiopental, although these changes did not reach a statistical significance because of the great variability. When changes in the ratio of the time constants were analyzed with respect to thiopental concentrations, thiopental clearly produced a dose-dependent decrease in the ratio of Thiop/Baseline, indicating that the anesthetic accelerated the decay rate in a dose-dependent manner (table 1). These changes were fitted to the empirical Hill equation ( $\text{ratio} = \text{IC}_{50}^n / (C^n + \text{IC}_{50}^n)$ , where  $C$  is thiopental concentration;  $n$  is Hill coefficient). Fitting was found to be very good ( $r^2 = 0.96$ ) and gave a  $\text{IC}_{50}$  of  $13.3 \mu\text{M} \pm 3.2$  and an  $n$  of  $1.05 \pm 0.27$ .

The % current decay remained unchanged with the repeated applications of nicotine. Thiopental dose-dependently increased % current decay (table 2). Increases in % current decay from the value for nicotine alone were analyzed by fitting to the following equation:

$$\% \text{ current decay} - 54.8 = 45.2 \times C^n / (C^n + \text{EC}_{50}^n)$$

where 54.8 is the mean value at the control condition, 45.2 is the maximal value,  $C$  is thiopental concentration, and  $n$  is Hill coefficient. The equation described the thiopental-induced increase in % current decay very well ( $r^2 = 0.98$ ).  $\text{EC}_{50}$  and Hill coefficient were estimated to be  $9.1 \pm 1.9 \mu\text{M}$  and  $0.73 \pm 0.14$ , respectively.

These analyses showed that thiopental dose-dependently accelerated the current decay and that thiopental concentrations producing the half maximal effects were slightly higher but comparable to  $\text{IC}_{50}$  for inhibition of the steady current.

#### Effects of Thiopental Preincubation Only

When cells were preincubated with thiopental, 100  $\mu\text{M}$ , and then only nicotine was applied, the peak current was slightly reduced, but inhibition of the steady



**Table 1. Time Constants of the Current Decay with or without Thiopental**

|                | Control         | Thiop 3 ( $\mu\text{M}$ ) | Thiop 10 ( $\mu\text{M}$ ) | Thiop 30 ( $\mu\text{M}$ ) | Thiop 100 ( $\mu\text{M}$ ) |
|----------------|-----------------|---------------------------|----------------------------|----------------------------|-----------------------------|
| Baseline (s)   | $3.79 \pm 1.58$ | $3.69 \pm 0.65$           | $4.76 \pm 1.92$            | $4.77 \pm 1.61$            | $6.03 \pm 2.72$             |
| Thiop (s)      | $3.29 \pm 1.44$ | $2.17 \pm 0.20$           | $2.63 \pm 1.07$            | $1.26 \pm 0.49$            | $0.42 \pm 0.12$             |
| Thiop/baseline | $1.14 \pm 0.30$ | $0.78 \pm 0.25$           | $0.63 \pm 0.19$            | $0.27 \pm 0.05^*$          | $0.10 \pm 0.04^\dagger$     |

Baseline = mean values for the baseline responses before thiopental administration; Thiop = mean values for the responses in the presence of thiopental in the thiopental groups and for the responses to the second applications of nicotine in the control group; Thiop/baseline = ratios of the time constants for two successive responses.

Values are mean  $\pm$  SE. There were 4 to 7 experiments for each condition.

\*  $P < 0.05$  versus Thiop/Baseline of the control group.

†  $P < 0.01$  versus Thiop/Baseline of the control group.

current was minimal (figs. 4A and 4B). Blockade by preapplied thiopental was significantly smaller for the peak and steady current than that by preincubation plus coapplication of thiopental, suggesting that channel opening by nicotine enhanced thiopental's effect (fig. 4C).

#### The Current-Voltage Relationship

The nicotine-induced current exhibited strong inward rectification and reversed around 0 mV, as previously described.<sup>13,31,33</sup> Thiopental depressed the inward current without any obvious changes in the reversal potential (fig. 5). The magnitudes of depression of the inward current were  $68 \pm 4$ ,  $77 \pm 2$ , and  $71 \pm 4\%$  at  $-30$ ,  $-50$ , and  $-70$  mV from the analysis of five pairs of the current-voltage curves. These values were statistically insignificant among three membrane potentials, suggesting that the thiopental's inhibition is voltage-independent from  $-30$  to  $-70$  mV. However, thiopental's effects seemed small at the more depolarizing potential.

#### Higher Concentration of Nicotine

When the dose of nicotine was increased to 100 or 300  $\mu\text{M}$ , the magnitudes of depression of the peak or

steady current by thiopental, 30  $\mu\text{M}$ , were not significantly different from those observed at the nicotine dose of 30  $\mu\text{M}$ . Therefore, the inhibition by thiopental was not reversed by the increased doses of nicotine (fig. 6).

#### The ATP-induced Current

ATP, 30  $\mu\text{M}$ , evoked a slowly desensitizing inward current mainly carried by sodium in this condition at  $-60$  mV. The ATP-induced current was almost completely abolished by 100  $\mu\text{M}$  of suramin, a nonselective purine  $\text{P}_2$  antagonist.<sup>22</sup> In the presence of suramin, the peak and steady current was  $1.3 \pm 0.7$  and  $1.4 \pm 0.8\%$  of the average of the control responses ( $n = 4$ ).

Thiopental, when preperfused for 5 min and then coapplied with ATP, did not affect the ATP-induced current at 30  $\mu\text{M}$  but slightly reduced the current at 100  $\mu\text{M}$ . Reduction in the steady current by 100  $\mu\text{M}$  of thiopental was slight but statistically significant (figs. 7A and 7B). Thiopental induced no remarkable changes in the current-voltage relationship of the ATP-induced peak current at membrane potential from  $-70$  to 30 mV (fig. 8).

**Table 2. Percent Current Decay of the Nicotine-induced Current with or without Thiopental**

|              | Control         | Thiop 3 ( $\mu\text{M}$ ) | Thiop 10 ( $\mu\text{M}$ )  | Thiop 30 ( $\mu\text{M}$ )         | Thiop 100 ( $\mu\text{M}$ )       |
|--------------|-----------------|---------------------------|-----------------------------|------------------------------------|-----------------------------------|
| Baseline (%) | $53.34 \pm 5.7$ | $41.61 \pm 3.92$          | $54.96 \pm 11.31$           | $57.26 \pm 9.78$                   | $60.07 \pm 4.72$                  |
| Thiop (%)    | $54.8 \pm 6.54$ | $67.34 \pm 3.13^*$        | $81.32 \pm 4.06^{*\dagger}$ | $83.05 \pm 4.72^{\dagger\ddagger}$ | $94.7 \pm 2.06^{\dagger\ddagger}$ |

Baseline = mean values for the baseline responses before thiopental administration; Thiop = mean values for the responses in the presence of thiopental in the thiopental groups and for the responses to the second applications of nicotine in the control group.

Values are mean  $\pm$  SE. There were 4 to 7 experiments for each condition.

\*  $P < 0.05$  versus baseline in the same group.

†  $P < 0.05$  versus corresponding value of the control group.

‡  $P < 0.01$  versus baseline in the same group.



## NICOTINIC AND PURINERGIC RECEPTORS

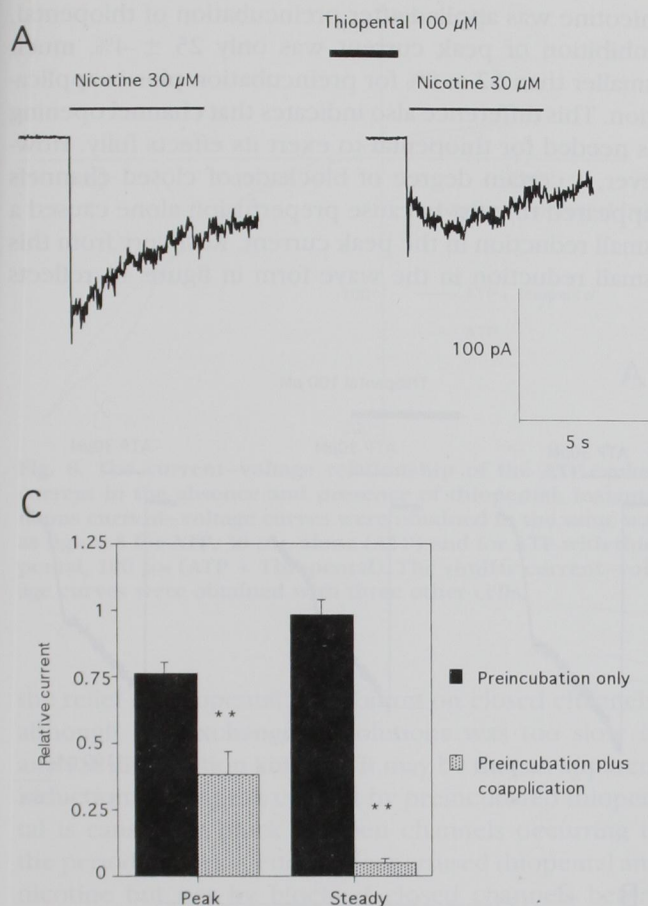

Fig. 4. Effects of preincubation of thiopental on the nicotine-induced current with or without coapplication of nicotine. (A) The cell was preperfused with thiopental 100  $\mu$ M for 5 min, and then only nicotine, 30  $\mu$ M, was applied through Y-tube. Preincubation of thiopental without simultaneous application of nicotine slightly inhibited the peak current but did not affect the steady current. (B) The same cell as (A) was preincubated with thiopental, 100  $\mu$ M, and then nicotine and thiopental were coapplied. Thiopental strongly suppressed the nicotine induced-current when preperfused and then coapplied with nicotine. (C) Summarized data for current inhibition by preincubation of thiopental, 100  $\mu$ M. The peak and steady current were suppressed more strongly by preincubation plus coapplication of thiopental ( $n = 7$ ) than by preincubation only ( $n = 5$ ). Each column represents mean with SEM. Asterisks indicate significant difference from preincubation only by unpaired  $t$  test (\* $P < 0.05$ ; \*\* $P < 0.01$ ).

## Discussion

The results of the present study demonstrate that thiopental at clinically relevant concentrations inhibited the neuronal nAChR-mediated current but not the  $P_{2X}$  purinergic receptor-mediated response in PC12 cells.

Thiopental at high concentrations did not induce any current consistent with the absence of functional GABA<sub>A</sub> receptors in PC12 cells as previously described,<sup>16</sup> whereas high concentration of barbiturates elicited an inward current in adrenal chromaffin cell under the similar conditions.<sup>8,10</sup> Therefore, a potential influence from direct effects of thiopental on GABA<sub>A</sub> receptor can be excluded in this study.

*Inhibition by Thiopental on Neuronal nAChRs*

Thiopental reversibly depressed the nicotine-induced current and augmented desensitization in a dose-dependent manner. The reversal potential of the nicotine-induced current was not changed, and inhibition was voltage-independent at membrane potential of  $-30$  to

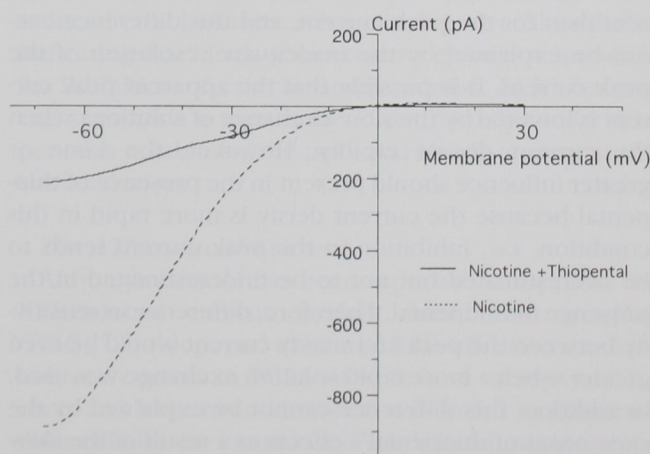

Fig. 5. The current-voltage relationship of the nicotine-induced current in the absence and presence of thiopental. Instantaneous current-voltage curves were obtained for nicotine, 30  $\mu$ M, alone (Nicotine) and for nicotine with thiopental, 30  $\mu$ M, after preincubation of thiopental (Nicotine + Thiopental) as described in method. The similar current-voltage curves were obtained with four other cells.



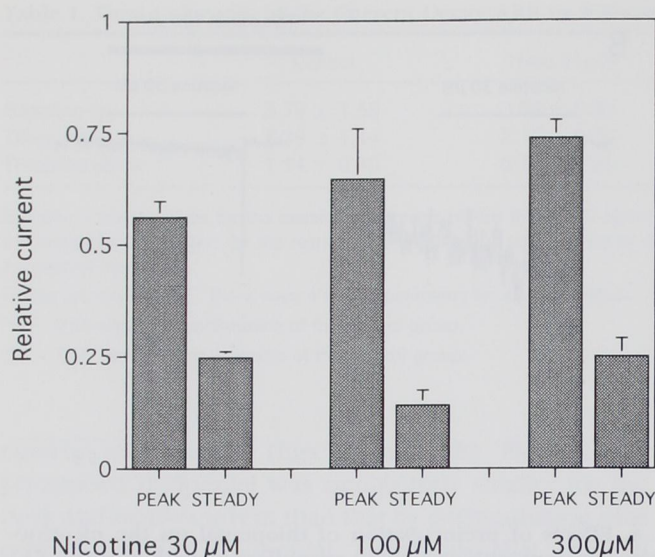

Fig. 6. Thiopental, 30  $\mu$ M, was preperfused and coapplied with nicotine, 100 or 300  $\mu$ M, and depression of the peak and steady current was analyzed in the same way as the experiments using nicotine, 30  $\mu$ M. There were no significant differences in the magnitudes of depression in the peak or steady current among the different doses of nicotine. The numbers of the experiments were six, five, and four for nicotine 30, 100, and 300  $\mu$ M.

–70 mV. The inhibitory effects were not reversed by the higher concentration of nicotine, suggesting that the effects of thiopental are not competitive at the nicotine-binding sites.

The inhibitory effects were greater for the steady current than for the peak current, and this difference cannot be explained by the inadequate resolution of the peak current. It is possible that the apparent peak current is lowered by the slow exchange of solutions when the current decays rapidly. However, the same or greater influence should present in the presence of thiopental because the current decay is more rapid in this condition, *i.e.*, inhibition in the peak current tends to be overestimated but not to be underestimated in the presence of thiopental. Therefore, difference in sensitivity between the peak and steady current would be even greater when a more rapid solution exchange was used. In addition, this difference cannot be explained by the slow onset of thiopental's effects as a result of the slow application because preincubation of thiopental did not potentiate the magnitude of inhibition of the peak current significantly.

Lack of significant effects of preincubation is attributable to lack of inhibition of closed channels and indicates preferential inhibition of open channels.<sup>34</sup> When

nicotine was applied after preincubation of thiopental, inhibition of peak current was only  $25 \pm 4\%$ , much smaller than  $62 \pm 9\%$  for preincubation plus coapplication. This difference also indicates that channel opening is needed for thiopental to exert its effects fully. However, a certain degree of blockade of closed channels appeared to exist because preperfusion alone caused a small reduction in the peak current. Recovery from this small reduction in the wave form in figure 4A reflects

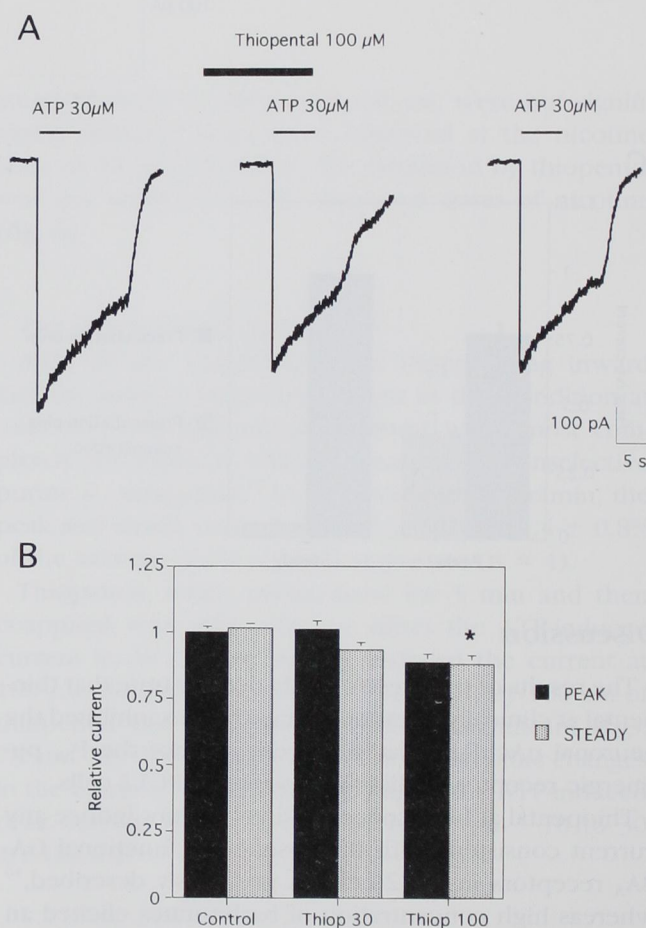

Fig. 7. Effects of thiopental on the ATP-evoked current. (A) The current activated by rapid perfusion of ATP, 30  $\mu$ M, was measured in cell held at –60 mV before and after thiopental (right and left panel). Thiopental, 100  $\mu$ M, was applied with ATP after 5 min preperfusion (middle panel). (B) Summarized data for effects of thiopental on the ATP-evoked current. The current was measured as in (A) and normalized to the average of the control current before and after thiopental applications. In the control condition, relative current is the second response normalized to the average of the first and third responses during three successive ATP applications. Each column represents mean and SEM of four to five experiments. An asterisk indicates significant difference from the control by Dunnett's test for multiple comparison (\* $P < 0.05$ ).



## NICOTINIC AND PURINERGIC RECEPTORS

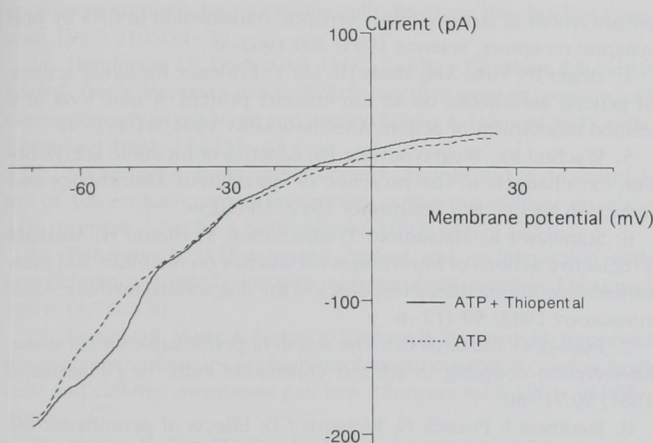

Fig. 8. The current-voltage relationship of the ATP-evoked current in the absence and presence of thiopental. Instantaneous current-voltage curves were obtained in the same way as figure 5 for ATP,  $30 \mu\text{M}$ , alone (ATP) and for ATP with thiopental,  $100 \mu\text{M}$  (ATP + Thiopental). The similar current-voltage curves were obtained with three other cells.

the relief of thiopental's inhibition on closed channels, although the exchange of solutions was too slow to analyze dissociation kinetics. It may be that an apparent reduction in the peak current by preincubated thiopental is caused by block of open channels occurring in the period of coexistence of preperfused thiopental and nicotine but not by block of closed channels before agonist application. A relatively slow exchange time of the drug application system allowed a sufficient time for two of these agents to coexist. Additionally, poor time resolution of the recording condition prevents the definitive conclusions. Therefore, it is not clear how much thiopental acts on closed channels, although most inhibition is exerted on open channels.

Preferential inhibition on open channels is consistent with the results of single channel recording of neuronal nAChRs using bovine chromaffin cells, which demonstrated that pentobarbitone and methohexitone principally shorten the mean open time and induce "flickering".<sup>8,9</sup> The decrease in the exponential time constants of the current decay by thiopental also agree with the decrease in mean channel open time.<sup>35</sup> Barbiturates' inhibition of open channels has been also reported for the non-NMDA receptor-mediated current in rat cortical neuron.<sup>36</sup>

The decay phases of neuronal nAChRs have been analyzed by fitting to one or two exponential functions in several papers.<sup>30,31,37,38</sup> Several factors, such as the subunit composition of the receptors, the speed of solu-

tion exchange, and agonist concentration, seem to influence which model better describes the current decay. In our study, the rate of the current decay varied greatly among cells, and the variability may reflect heterogeneity of the nAChRs in PC12 cells. The presence of the cells whose time constants of decay were rather high seemed to favor the single exponential model. This model has been used in the previous reports using the perfusion system with the similar exchange time.<sup>31,37</sup> It is also possible that the fast phase of decay was obscured because of the relatively slow exchange of solutions. Despite the great variability in the baseline, thiopental was shown to accelerate the current decay by calculating the ratio of Thiop-to-Baseline, and this notion was further supported by the increases in % current decay by thiopental.

With respect to the site of action, preferential inhibition of open channels does not necessarily mean that thiopental acts on the ion-permeating pore. Voltage-independence of inhibition at negative membrane potentials suggests a different mechanism(s) of block from charged channel blockers such as local anesthetics.<sup>39</sup> However, it does not eliminate the pore as a possible site of action because uncharged thiopental molecules, which account for a half of all molecules at pH 7.4, could cause the inhibition.

IC<sub>50</sub>s were 56.7 and  $7.4 \mu\text{M}$  for the peak and steady current in the absence of preincubation. IC<sub>50</sub> for the steady current in this study is close to the reported IC<sub>50</sub> ( $7.8 \mu\text{M}$ ) for thiopental's inhibition of the nicotine-induced catecholamine release in dog adrenal medulla,<sup>6</sup> indicating that block of nicotine receptor is responsible for inhibition of catecholamine release. EC<sub>50</sub> for general anesthesia is reportedly  $25 \mu\text{M}$ .<sup>32</sup> Inhibition by thiopental is notable for the peak and steady current at this concentration.

#### The ATP-induced Current

Although ethanol has been reported to suppress the ATP-induced current in frog dorsal root ganglion (DRG),<sup>40,41</sup> thiopental exhibited little effect on the ATP-induced current in PC12 cells. Several subtypes of P<sub>2X</sub> receptors have been identified and found to distribute differentially in central and peripheral nervous systems.<sup>42,43</sup> It is likely that the dominant subunits in frog DRG and PC12 cells are different because they exhibit different sensitivities to agonists.<sup>21,22,42</sup> Therefore, difference in the subunits and difference in the agents can explain this discrepancy. P<sub>2X</sub> receptors in rat sympathetic neuron from superior cervical ganglia mostly re-



semble those in PC12 cells.<sup>29</sup> Therefore, it is suggested that thiopental does not much affect P<sub>2X</sub> receptors in rat sympathetic neurons.

Although the P<sub>2X</sub> receptors function as a ligand-gated ion channel, there is no primary sequence homology between the P<sub>2X</sub> receptor and other ligand-gated ion channels such as nicotinic, glutamate, GABA<sub>A</sub>, and glycine receptor, and the structure of the P<sub>2X</sub> receptor is considered to be very different from that of other ligand-gated ion channels.<sup>42</sup> The finding that P<sub>2X</sub> receptors are much less sensitive to thiopental than neuronal nAChRs indicates that P<sub>2X</sub> receptors lack the structure wherein thiopental can act on with high affinity.

### Clinical Implications

We found that neuronal nAChRs in PC12 cells are very sensitive to thiopental, whereas this is not the case for P<sub>2X</sub> purinergic receptors. The former finding is consistent with the previous studies, demonstrating high sensitivity of molluscan neuronal nAChRs receptors to various anesthetics.<sup>44</sup> In molluscan, neuronal nAChRs exhibit different characteristics from those of mammalian receptors, *i.e.*, some of molluscan receptors show extraordinarily high sensitivity to nicotinic agonists and are permeable to Cl<sup>-</sup>.<sup>44</sup> Neuronal nAChRs receptors in PC12 cells resemble the receptors of sympathetic ganglia neuron in terms of ion selectivity, current-voltage relationship, pharmacology, putative subunit composition.<sup>12-14,24,25</sup> Therefore, it is conceivable that thiopental suppresses synaptic transmission in sympathetic ganglia by inhibition of neuronal nAChRs. However, further studies are needed to define anesthetic effects on central nAChRs and the significance of such effects for general anesthesia because central nAChRs are heterogeneous and different from ganglionic counterparts in terms of subunit composition and pharmacology.<sup>2</sup>

The authors thank Dr. Ken Nakazawa (Division of Pharmacology, National Institute of Health Sciences) and Dr. Susumu Kawamoto (Department of Bacteriology, Yokohama City University School of Medicine) for their advice.

### References

- Sargent PB: The diversity of neuronal nicotinic acetylcholine receptors. *Annu Rev Neurosci* 1993; 16:403-43
- McGehee DS, Role LW: Physiological diversity of nicotinic acetylcholine receptors expressed by vertebrate neurons. *Annu Rev Physiol* 1995; 57:521-46
- McGehee DS, Heath MJ, Gelber S, Devay P, Role LW: Nicotine enhancement of fast excitatory synaptic transmission in CNS by presynaptic receptors. *Science* 1995; 269:1962-6
- Dilger JP, Vidal AM, Mody HI, Liu Y: Evidence for direct actions of general anesthetics on an ion channel protein. A new look at a unified mechanism of action. *ANESTHESIOLOGY* 1994; 81:431-42
- Wachtel RE, Wegrzynowicz ES: Kinetics of nicotinic acetylcholine ion channels in the presence of intravenous anaesthetics and induction agents. *Br J Pharmacol* 1992; 106:623-7
- Sumikawa K, Matsumoto T, Amenimori Y, Hirano H, Amakata Y: Selective actions of intravenous anesthetics on nicotinic- and muscarinic-receptor-mediated responses of the dog adrenal medulla. *ANESTHESIOLOGY* 1983; 59:412-6
- Pocock G, Richards CD: The action of pentobarbitone on stimulus-secretion coupling in adrenal chromaffin cells. *Br J Pharmacol* 1987; 90:71-80
- Jacobson I, Pocock G, Richards CD: Effects of pentobarbitone on the properties of nicotinic channels of chromaffin cells. *Eur J Pharmacol* 1991; 202:331-9
- Charlesworth P, Richards CD: Anaesthetic modulation of nicotinic ion channel kinetics in bovine chromaffin cells. *Br J Pharmacol* 1995; 114:909-17
- Peters JA, Kirkness EF, Callachan H, Lambert JJ, Turner AJ: Modulation of the GABA<sub>A</sub> receptor by depressant barbiturates and pregnane steroids. *Br J Pharmacol* 1988; 94:1257-69
- Peters JA, Lambert JJ, Cottrell GA: An electrophysiological investigation of the characteristics and function of GABA<sub>A</sub> receptors on bovine adrenomedullary chromaffin cells. *Pflugers Arch* 1989; 415:95-103
- Sands SB, Barish ME: Calcium permeability of neuronal nicotinic acetylcholine receptor channels in PC12 cells. *Brain Res* 1991; 560:38-42
- Ifune CK, Steinbach JH: Inward rectification of acetylcholine-elicited currents in rat pheochromocytoma cells. *J Physiol (Lond)* 1992; 457:143-65
- Rogers SW, Mandelzys A, Deneris ES, Cooper E, Heinemann S: The expression of nicotinic acetylcholine receptors by PC12 cells treated with NGF. *J Neurosci* 1992; 12:4611-23
- Miller LG, Tischler AS, Jumbblatt JE, Greenblatt DJ: Benzodiazepine binding sites on PC12 cells: Modulation by nerve growth factor and forskolin. *Neurosci Lett* 1988; 89:342-8
- Hales TG, Tyndale RF: Few cell lines with GABA<sub>A</sub> mRNAs have functional receptors. *J Neurosci* 1994; 14:5429-36
- Zimmermann H: Signalling via ATP in the nervous system. *Trends Neurosci* 1994; 17:420-6
- Edwards FA, Gibb AJ, Colquhoun D: ATP receptor-mediated synaptic current in the central nervous system. *Nature* 1992; 359:144-7
- Evans RJ, Derkach V, Surprenant A: ATP mediates fast synaptic transmission in mammalian neurons. *Nature* 1992; 357:503-5
- Nabekura J, Ueno S, Ogawa T, Akaike N: Colocalization of ATP and Nicotinic Ach receptors in the identified vagal preganglionic neuron of rat. *J Physiol* 1995; 489:519-27
- Nakazawa K, Fujimori K, Takanaka A, Inoue K: An ATP-activated conductance in pheochromocytoma cells and its suppression by extracellular calcium. *J Physiol (Lond)* 1990; 428:257-72
- Nakazawa K, Inoue K, Fujimori K, Takanaka A: Effects of ATP antagonists on purinoceptor-operated inward currents in rat pheochromocytoma cells. *Pflugers Arch* 1991; 418:214-9
- Koizumi S, Ikeda M, Nakazawa K, Inoue K, Ito K, Inoue K: Inhibition by haloperidol of adenosine 5'-triphosphate-evoked re-



## NICOTINIC AND PURINERGIC RECEPTORS

sponses in rat pheochromocytoma cells. *Biochem Biophys Res Commun* 1995; 210:624-30

24. Henderson LP, Godvin MJ, Liu C, Gardner PD, Maue RA: Nerve growth factor increases nicotinic Ach receptor gene expression and current density in wild-type and protein kinase A-deficient PC12 cells. *J Neurosci* 1994; 14:1153-63

25. Mandelzys A, Koninck P, Cooper E: Agonist and toxin sensitivities of Ach-evoked currents on neurons expressing multiple nicotinic Ach receptor subunits. *J Neurophysiol* 1995; 74:1212-21

26. Nakazawa K: ATP-activated current and its interaction with acetylcholine-activated current in rat sympathetic neurons. *J Neurosci* 1994; 14:740-50

27. Hamill OP, Marty A, Neher E, Sakman B, Sigworth FJ: Improved patch-clamp techniques for high-resolution current recording from cells and cell-free membrane patches. *Pflügers Arch* 1981; 391:85-100

28. Murase K, Ryu PD, Randic M: Excitatory and inhibitory amino acids and peptide-induced responses in acutely isolated rat spinal dorsal horn neurons. *Neurosci Lett* 1989; 103:56-63

29. Nakazawa K, Inoue K, Koizumi S, Ikeda M, Inoue K: Inhibitory effects of capsaicin on acetylcholine-evoked responses in rat pheochromocytoma cells. *Br J Pharmacol* 1994; 113:296-302

30. Valenta DC, Downing JE, Role LW: Peptide modulation of ACh receptor desensitization controls neurotransmitter release from chicken sympathetic neurons. *J Neurophysiol* 1993; 69:928-42

31. Ifune CK, Steinbach JH: Modulation of acetylcholine-elicited currents in clonal rat pheochromocytoma (PC12) cells by internal polyphosphates. *J Physiol (Lond)* 1993; 463:431-47

32. Franks NP, Lieb WR: Molecular and cellular mechanisms of general anaesthesia. *Nature* 1994; 367:607-14

33. Sands SB, Barish ME: Neuronal nicotinic acetylcholine receptor currents in pheochromocytoma (PC12) cells: Dual mechanisms of rectification. *J Physiol (Lond)* 1992; 447:467-87

34. Forman SA, Miller KW, Yellen G: A discrete site for general anesthetics on a postsynaptic receptor. *Mol Pharmacol* 1995; 48:574-81

35. Lambert JJ: Drug-induced modification of ionic conductance at the neuromuscular junction. *Ann Rev Pharmacol Toxicol* 1983; 23:505-39

36. Marszalec W, Narahashi T: Use-dependent pentobarbital block of kainate and quisqualate currents. *Brain Res* 1993; 608:7-15

37. Clapham DE, Neher E: Substance P reduces acetylcholine-induced currents in isolated bovine chromaffin cells. *J Physiol (Lond)* 1984; 347:255-77

38. Inoue M, Kuriyama H: Properties of the nicotinic-receptor-activated current in adrenal chromaffin cells of the guinea-pig. *Pflügers Arch* 1991; 419:13-20

39. Charlesworth P, Jacobson I, Pocock G, Richards CD: The mechanism by which procaine inhibits catecholamine secretion from bovine chromaffin cells. *Br J Pharmacol* 1992; 106:802-12

40. Li C, Aguayo L, Peoples RW, Weight FF: Ethanol inhibits a neuronal ATP-gated ion channel. *Mol Pharmacol* 1993; 44:871-5

41. Li C, Peoples RW, Weight FF: Alcohol action on a neuronal membrane receptor: Evidence for a direct interaction with the receptor protein. *Proc Natl Acad Sci U S A* 1994; 91:8200-4

42. Surprenant A, Buell G, North RA: P<sub>2X</sub> receptors bring new structure to ligand-gated ion channels. *Trends Neurosci* 1995; 18:224-9

43. Collo G, North RA, Kawashima E, Merlo-Pich E, Neidhart S, Surprenant A, Buell G: Cloning of P<sub>2X5</sub> and P<sub>2X6</sub> receptors and the distribution and properties of an extended family of ATP-gated ion channels. *J. Neurosci* 1996; 16:2495-507

44. McKenzie D, Franks NP, Lieb WR: Actions of general anaesthetics on a neuronal nicotinic acetylcholine receptor in isolated identified neurones of *Lymnaea stagnalis*. *Br J Pharmacol* 1995; 115:275-82
